# Supplementary material
Source: Springer Nature journal article supplement (https://www.springermedizin.de/resource/supplementary/12986_2009_212_MOESM5_ESM.pdf/25655604)

Acetoacetate  
High-carbohydrate meal

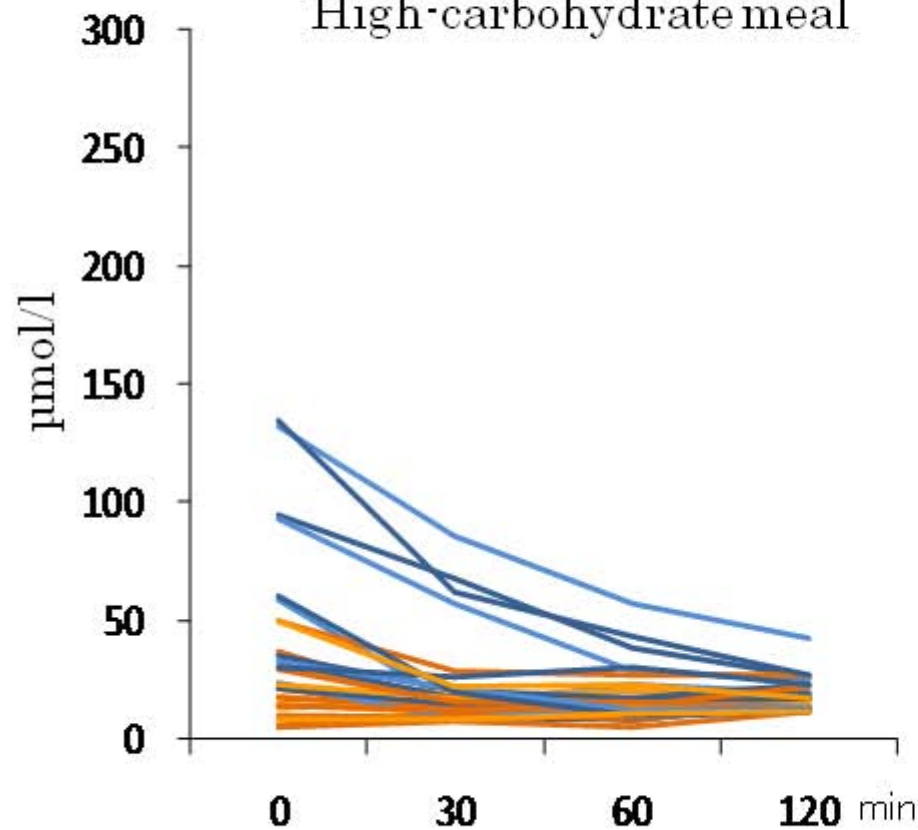

Acetoacetate  
Low-carbohydrate meal

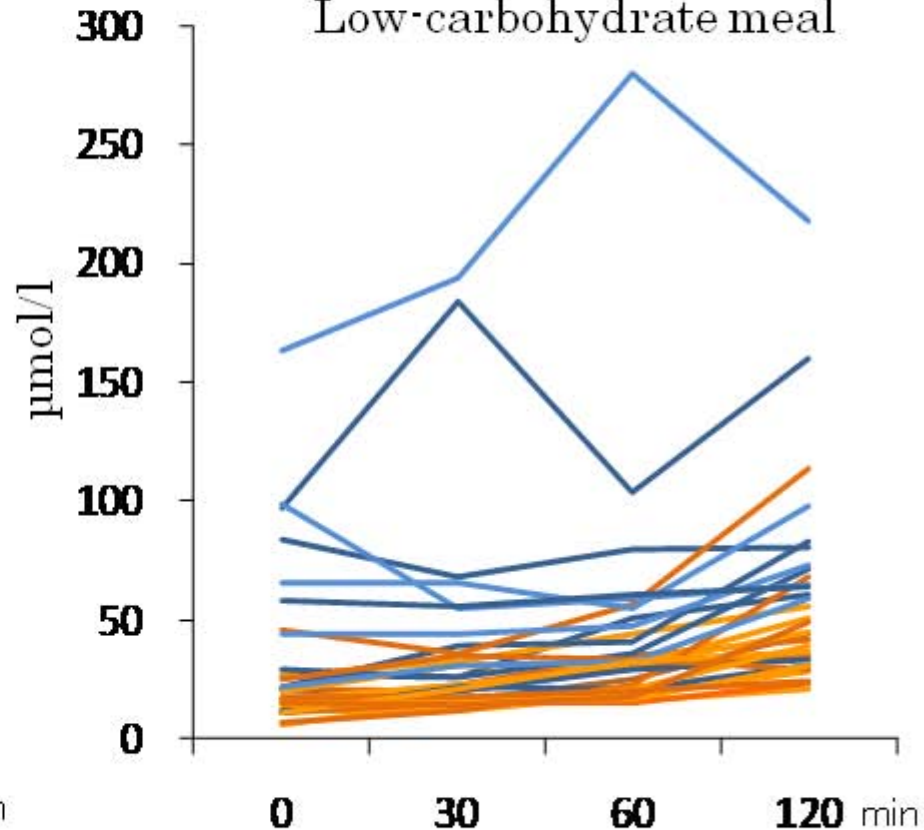

Supplement: MOESM5 [file 25655604]
